# Supplementary material for: The Validity of Conscientiousness Is Overestimated in the Prediction of Job Performance
Source: PLoS One. 2015 Oct 30;10(10):e0141468. doi: 10.1371/journal.pone.0141468 (PMC4627756; doi:10.1371/journal.pone.0141468)
Supplement: S3 Table — Lowest value = lowest mean estimate from all analyses (r-oRE; osr, r-oFE, t&f r-o, smm r-o, sms r-o, PET-PEESE, and p-uniform); r-oRE = random-effects weighted mean observed correlation (the potentially best mean estimate); Highest value = highest mean estimate from all analyses (r-oRE; osr, r-oFE, t&f r-o, smm r-o, sms r-o, PET-PEESE, and p-uniform); BRE = Baseline range estimate: the absolute range between r-oRE and the estimate farthest away (either the lowest or highest value); MRE = Maximum range estimate: the absolute range between the lowest or highest value. When calculating the relative difference of the range estimates, we used r-oRE, the potentially best mean estimate, as the base (i.e., as 100%). Ideally, BRE and MRE should be identical. If not, outliers or other artifacts may have caused such differences. Practical difference: negligible = if the relative range (BRE or MRE) is smaller than 20%; moderate = if the relative range (BRE or MRE) is larger than 20%; large = if the relative range (BRE or MRE) is larger than 40% [Kepes et al., 2012]. (DOCX) [file pone.0141468.s003.docx]

**S3 Table. Robustness of results and conclusions of the analyses (including *p*-uniform estimates)**

| Distribution | Lowest value |  | Highest value | BRE | Practical difference | MRE | Practical difference | Conclusion a |
| --- | --- | --- | --- | --- | --- | --- | --- | --- |
| Conscientiousness | .12 f | .16 | .19 h | .04 (25%) | moderate | .07 (44%) | large | Moderate to large difference |
| Frame of reference |  |  |  |  |  |  |  |  |
| - Non-contextualized | .09 f | .15 | .20 h | .06 (40%) | large | .07 (47%) | large | Large difference |
| - Contextualized | .17 d, g | .19 | .20 c | .02 (11%) | negligible | .03 (16%) | negligible | Negligible difference |
| Source |  |  |  |  |  |  |  |  |
| - Journal articles | .07 g | .19 | .19 b, c | .12 (63%) | large | .12 (63%) | large | Large difference |
| - Non-contextualized | .07 g | .19 | .21 h | .12 (63%) | large | .14 (74%) | large | Large difference |
| - Contextualized | .07 g | .19 | .20 c | .12 (63%) | large | .13 (68%) | large | Large difference |
| - Non-journal articles | .10 e | .12 | .18 h | .02 (17%) | negligible | .08 (67%) | large | Negligible to large difference |
| - Non-contextualized | .08 e | .11 | .19 h | .03 (27%) | moderate | .11 (100%) | large | Moderate to large difference |
| - Contextualized | *Distribution is too small to reach definite conclusions regarding the robustness of the meta-analytic mean estimate* | | | | | | | |
| Purpose |  |  |  |  |  |  |  |  |
| - General purpose | .08 f | .14 | .20 h | .06 (43%) | large | .12 (86%) | large | Large difference |
| - Non-contextualized | .11 d, e | .14 | .15 c | .03 (21%) | moderate | .04 (71%) | large | Moderate to large difference |
| - Contextualized | *Distribution is too small to reach definite conclusions regarding the robustness of the meta-analytic mean estimate* | | | | | | | |
| - Workplace purpose | .16 g | .19 | .20 c | .03 (16%) | negligible | .04 (21%) | moderate | Negligible to moderate difference |
| - Non-contextualized | .09 g | .19 | .20 c | .10 (53%) | large | .11 (58%) | large | Large difference |
| - Contextualized | .19 c, d, e, f | .20 | .21 c | .01 (5%) | negligible | .02 (10%) | negligible | Negligible difference |
| Sample |  |  |  |  |  |  |  |  |
| - Incumbents | .11 f | .16 | .19 h | .05 (31%) | moderate | .08 (50%) | large | Moderate to large difference |
| - Non-contextualized | .09 f | .15 | .20 h | .06 (40%) | large | .11 (73%) | large | Large difference |
| - Contextualized | .11 g | .19 | .20 c | .08 (42%) | large | .09 (47%) | large | Large difference |
| - Applicants | *Distribution is too small to reach definite conclusions regarding the robustness of the meta-analytic mean estimate* | | | | | | | |
| - Non-contextualized | *Distribution is too small to reach definite conclusions regarding the robustness of the meta-analytic mean estimate* | | | | | | | |
| - Contextualized | *Distribution is too small to reach definite conclusions regarding the robustness of the meta-analytic mean estimate* | | | | | | | |
| Design |  |  |  |  |  |  |  |  |
| - Concurrent design | .11 f | .15 | .19 h | .04 (27%) | moderate | .05 (31%) | moderate | Moderate difference |
| - Non-contextualized | .09 f | .15 | .20 h | .06 (40%) | large | .06 (40%) | large | Large difference |
| - Contextualized | .11 g | .18 | .19 c | .07 (39%) | moderate | .08 (44%) | large | Moderate to large difference |
| - Predictive design | *Distribution is too small to reach definite conclusions regarding the robustness of the meta-analytic mean estimate* | | | | | | | |
| - Non-contextualized | *Distribution is too small to reach definite conclusions regarding the robustness of the meta-analytic mean estimate* | | | | | | | |
| - Contextualized | *Distribution is too small to reach definite conclusions regarding the robustness of the meta-analytic mean estimate* | | | | | | | |
| Scale |  |  |  |  |  |  |  |  |
| - NEO | .08 f, g | .14 | .19 h | .06 (43%) | large | .11 (79%) | large | Large difference |
| - PCI | .20 d | .24 | .25 c | .04 (17%) | negligible | .05 (21%) | moderate | Negligible to moderate difference |
| - PSI | .21 e, f | .22 | .22 b, c, d | .01 (5%) | negligible | .01 (5%) | negligible | Negligible difference |

*Note:* Lowest value = lowest mean estimate from all analyses (; osr, , t&f , smm , sms , PET-PEESE, and *p*-uniform); = random-effects weighted mean observed correlation (the potentially best mean estimate); Highest value = highest mean estimate from all analyses (; osr, , t&f , smm , sms , PET-PEESE, and *p*-uniform); BRE = Baseline range estimate: the absolute range between and the estimate farthest away (either the lowest or highest value); MRE = Maximum range estimate: the absolute range between the lowest or highest value. When calculating the relative difference of the range estimates, we used , the potentially best mean estimate, as the base (i.e., as 100%). Ideally, BRE and MRE should be identical. If not, outliers or other artifacts may have caused such differences. Practical difference: negligible = if the relative range (BRE or MRE) is smaller than 20%; moderate = if the relative range (BRE or MRE) is larger than 20%; large = if the relative range (BRE or MRE) is larger than 40% (Kepes et al., 2012).

a  Conclusions of a negligible difference indicate that the meta-analytic mean estimate (i.e., ) is likely to be robust. Conclusions of a moderate, moderate to large, or large difference indicates that the meta-analytic mean estimate (i.e., ) is likely to be non-robust and could be misestimated (i.e., could be under- or overestimated; typically overestimated in our analyses).

b = value from ; c = value from osr, ; d = value from t&f ; e = value from smm ; f = value from sms ; g = value from PET-PEESE (value from PEESE if the PET value was significant, value from PET if it was not significant); h = value from *p*-uniform.
